# Supplementary material for: Cellular retinoic acid binding protein-II expression and its potential role in skin aging
Source: publisher site journal article supplement (doi:10.18632/aging.101813), 2019-03-18
Supplement: Supplementary file [file aging-v11i6-101813-supplementary-material-SD1.pdf]

## SUPPLEMENTARY TABLE

**Supplementary Table 1. Primers used for Real-Time PCR.**

| Gene     | Primer sequence                                                                  | Accession number | Tann (°C) |
|----------|----------------------------------------------------------------------------------|------------------|-----------|
| Col1A1   | sense 5'-tgttcctactcagccgtctgt-3'<br>antisense 5'-gagccctcgcttccgtactc-3'        | NM_007742.3      | 60        |
| Col1A2   | sense 5'-tgcccatctggtaaagaag-3'<br>antisense 5'-accttgccacctgaacac-3'            | NM_007743.2      | 60        |
| TGFβ1    | sense 5'-ggagcccgaagcggacta-3'<br>antisense 5'-cgaatgtctgacgtattgaagaaca-3'      | NM_011577.1      | 60        |
| TGFβ RI  | sense 5'-tagctgaaattgacctaattcctcg-3'<br>antisense 5'-tgcggttatggcagatatagacc-3' | NM_009370.2      | 60        |
| TGFβ RII | sense 5'-gggattgccatagctgtcat-3'<br>antisense 5'-tgatggcacaattgtcactg-3'         | NM_009371.3      | 60        |
| MMP-2    | sense 5'-agatcttcttctcaaggaccggtt-3'<br>antisense 5'-ggctggtcagtggttgggta-3'     | NM_008610.2      | 60        |
| CRABP-II | sense 5'-tgatgaggaagatcgctgtg-3'<br>antisense 5'-ttcactctcccattcacc -3'          | NM_007759.2      | 60        |
| GAPDH    | sense 5'-aacttggcattgtggaagg-3'<br>antisense 5'-cacattggggtaggaacac-3'           | NM_001289726.1   | 60        |
